# Supplementary material for: Inhibitory synaptic transmission is impaired at higher extracellular Ca2+ concentrations in Scn1a+/− mouse model of Dravet syndrome
Source: PubMed Central journal article supplement (PMC8137694; doi:10.1038/s41598-021-90224-4), 2021-05-20
Supplement: 41598_2021_90224_MOESM1_ESM.pdf [file 41598_2021_90224_MOESM1_ESM.pdf]

**a**

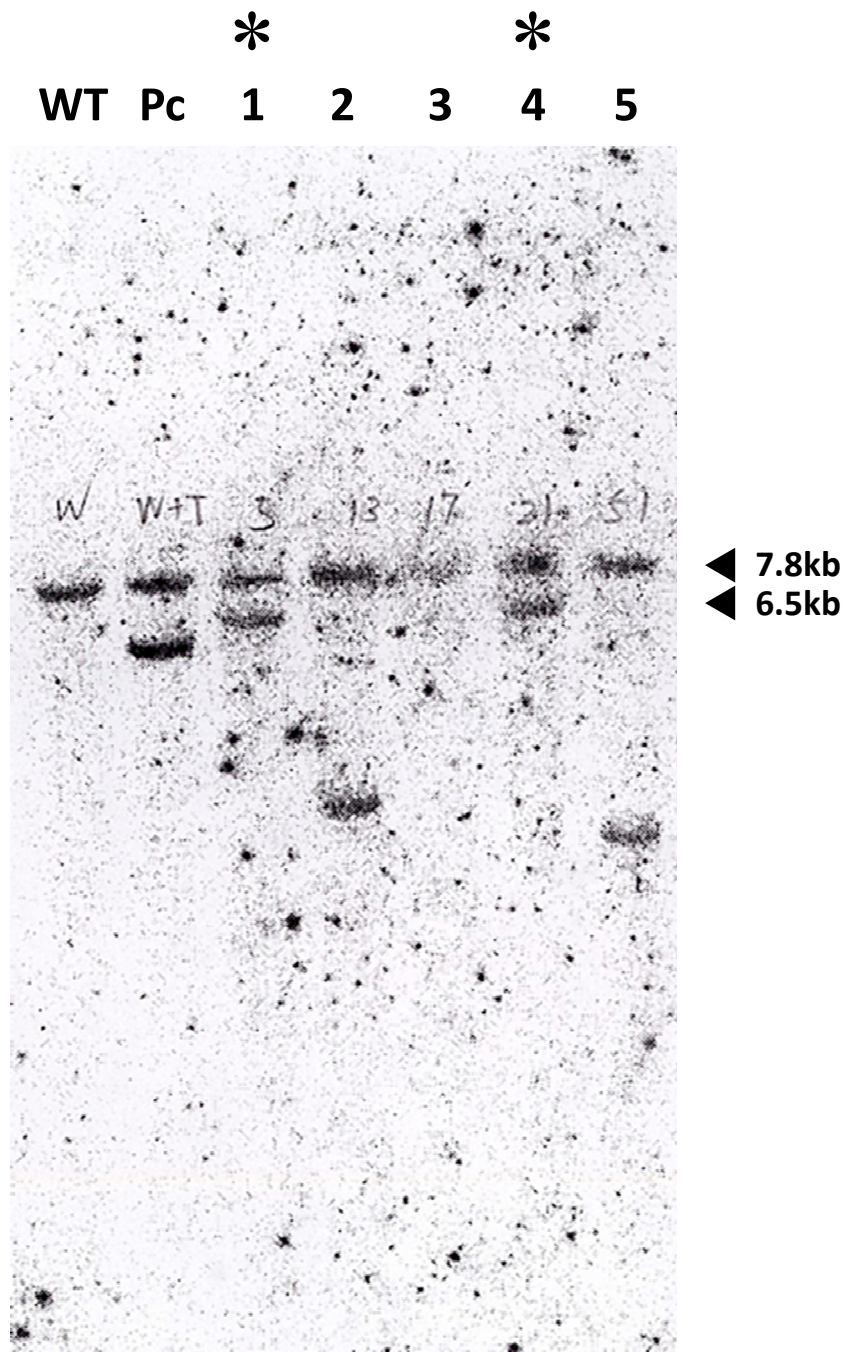

**Figure S1.** Raw data underlying Figure 1c.

(a) Full-length image of the Southern hybridization for seven candidate clones. Handwritten characters indicate the identification numbers of the samples.

## Uchino et al., Supporting Information

**a**

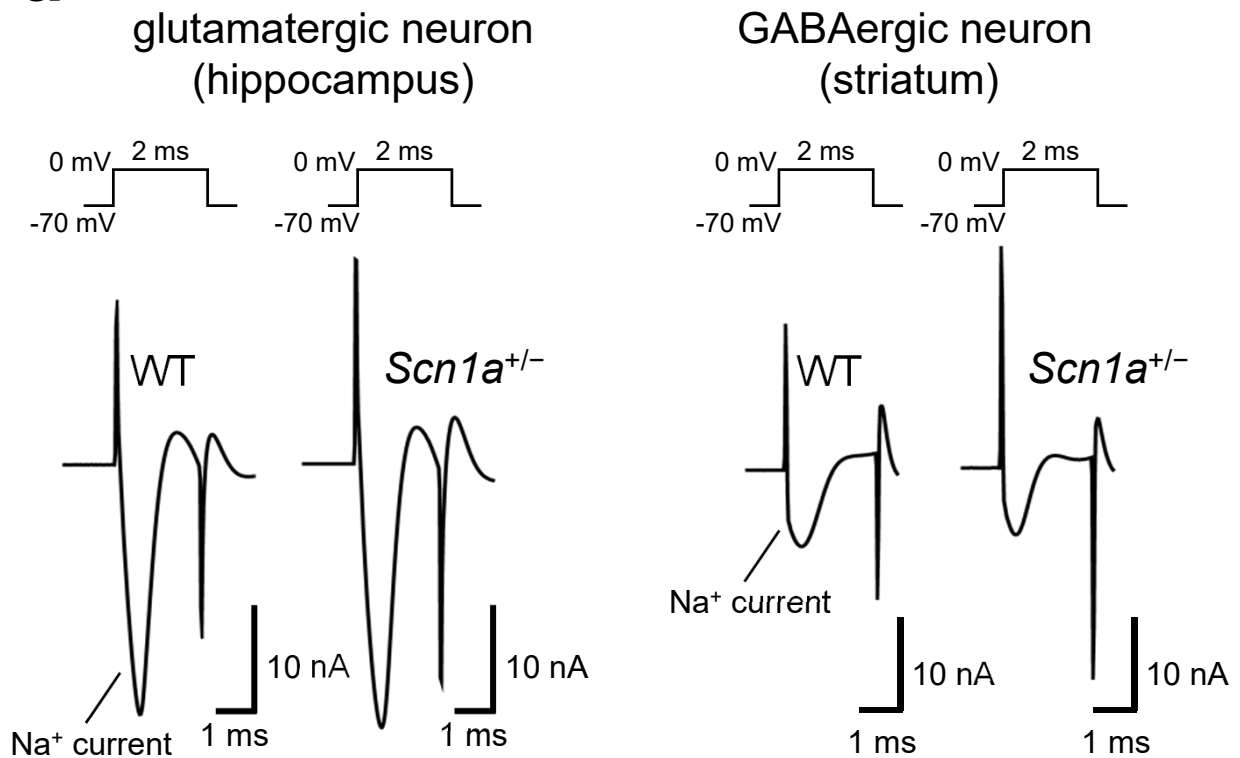

**b**

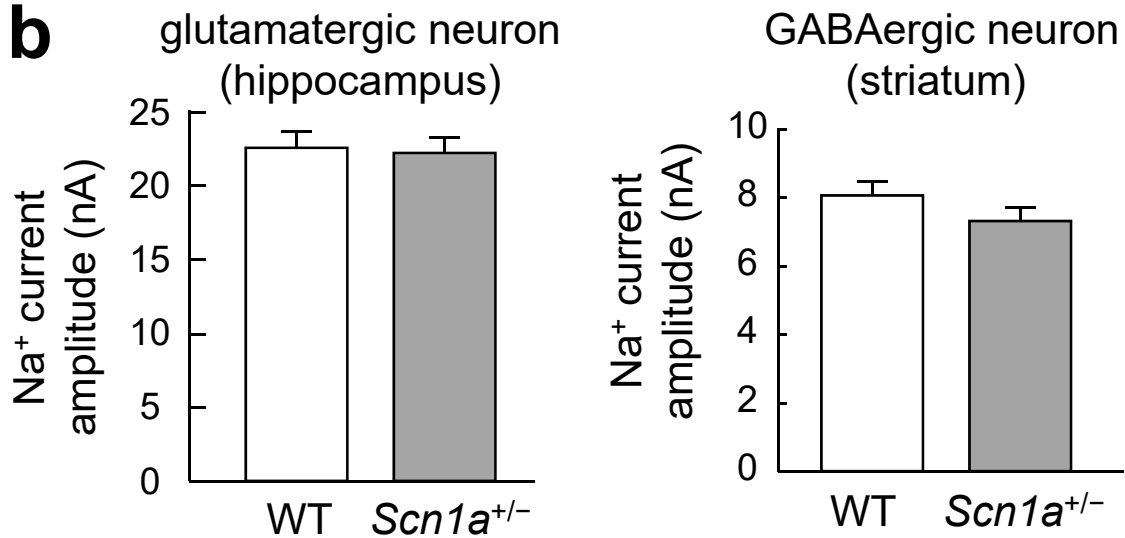

**Figure S2.** No change in the Na<sup>+</sup> current amplitude in WT and *Scn1a*<sup>+/-</sup> neurons of the hippocampus and striatum.

(a) Representative traces of Na<sup>+</sup> currents evoked by depolarizing pulses (-70 mV to 0 mV) via patch pipette for 2 ms under the voltage-clamp condition. Note that there is no difference in Na<sup>+</sup> currents between WT and *Scn1a*<sup>+/-</sup> neurons of the hippocampus and striatum. (b) Average amplitudes of the Na<sup>+</sup> current in WT and *Scn1a*<sup>+/-</sup> neurons of the hippocampus and striatum.
